# Supplementary material
Source: PubMed Central journal article supplement (PMC9978037)
Supplement: NIHMS1834124-supplement-1.pdf [file NIHMS1834124-supplement-1.pdf]

### Supplemental Table 1: ICD9/10 codes used in study

#### **Toxoplasmosis infection (inclusion)**

| Diagnosis          | ICD9  | ICD10  |
|--------------------|-------|--------|
| Toxo - ocular      | 130.1 | B58.0x |
|                    | 130.2 |        |
| Toxo - unspecified | 130.9 | B58.9  |

#### **Congenital toxoplasmosis (exclusion)**

| ICD9  | ICD10 |
|-------|-------|
| 771.2 | P37.x |

#### **ICD9/10 codes for diseases associated with PPI/H2 blocker use**

| Diagnosis                | ICD9   | ICD10  |
|--------------------------|--------|--------|
| Reflux                   | 530.11 | K21.x  |
| esophagitis unspec       | 530.10 |        |
| eosinophilic esophagitis | 530.13 |        |
| Acute esophagitis        | 530.12 |        |
| Gastroesoph NEC          | 530.19 | K29.70 |
| GERD                     | 530.81 |        |
| Duodenitis               | 535.6  | K29.80 |
| gastroduodenitis         |        | K29.90 |
| heartburn                | 787.1  | R12    |
|                          |        | R10.13 |
| alcoholic gastritis      |        | K29.20 |
| Gastritis                |        | K29.30 |
|                          |        | K29.40 |
|                          |        | K29.50 |
|                          |        | K29.60 |
| other chest pain         |        | R07.89 |
| Esophagitis codes        | 530.1x | K22.1x |
|                          | 530.2x | K22.7x |
|                          | 530.3x | K22.9  |
|                          |        | K23.x  |
|                          |        | K25.x  |
|                          |        | K26.x  |
|                          |        | K27.x  |
|                          |        | K28.x  |
|                          |        | K29.x  |

|           |       |        |
|-----------|-------|--------|
| dyspepsia |       | K30.x  |
|           |       | F45.9  |
| Dysphagia | 787.2 | R13.10 |
